# Supplementary material
Source: publisher site journal article supplement (https://www.dovepress.com/article/482824)
Supplement: Supplementary file 1 [file get_supplementary_file.php]

**Supplementary Table S1** Associations between other CGM metrics and DPN

|  | Model 1 |  | Model 2 |  | Model 3 |  | Model 4 |  |
| --- | --- | --- | --- | --- | --- | --- | --- | --- |
|  | OR (95% CI) | *P* value | OR (95% CI) | *P* value | OR (95% CI) | *P* value | OR (95% CI) | *P* value |
| SD | 1.24 (1.10, 1.40) | <0.001 | 1.20 (1.06, 1.36) | 0.005 | 1.20 (1.05, 1.37) | 0.009 | 1.14 (0.98, 1.32) | 0.080 |
| CV | 1.13 (1.00, 1.28) | 0.044 | 1.10 (0.97, 1.24) | 0.148 | 1.10 (0.97, 1.26) | 0.151 | 1.07 (0.94, 1.22) | 0.329 |
| MG | 1.21 (1.07, 1.37) | 0.002 | 1.19 (1.05, 1.351) | 0.006 | 1.17 (1.02, 1.33) | 0.022 | 1.11 (0.96, 1.28) | 0.169 |
| TIR | 0.79 (0.70, 0.90) | <0.001 | 0.83 (0.73, 0.94) | 0.003 | 0.84 (0.74, 0.96) | 0.012 | 0.87 (0.76, 1.00) | 0.052 |

**Notes:** Model 1: unadjusted; Model 2: adjusted for age and sex; Model 3: adjusted for age, sex, BMI, diabetes duration, blood pressure, creatinine, urinary albumin-to-creatinine ratio, lipid profile; Model 4: Model 3 + glycated hemoglobin.

**Abbreviations:** OR, odds ratio; CI, confidence interval; CGM, continuous glucose monitoring; DPN, diabetic peripheral neuropathy; SD, standard deviation; CV, Coefficient of variation; MG, Mean glucose; TIR, time in range.
